# Supplementary material
Source: MDPI journal article supplement (https://www.mdpi.com/2072-4292/10/5/698)
Supplement: s1 [file s1]

## Sheet: Sheet1
Species	Family	Total number of individuals	Amoss	Aoupini?	Arago	Ateou	Bouirou	Jieve	FP9	FP12	FP17	FP26	Gohapin	Grand Lac	Koumac	La Guen	Tiwae	Wekori	DBH min	DBH mean	DBH median	DBH max
Amborella trichopoda	Amborellaceae	11		5	2		4												10	14.2	11.6	42.5
Euroschinus elegans	Anacardiaceae	7												7					10.2	16.3	16.2	24.2
Euroschinus obtusifolius	Anacardiaceae	28									19	7			1			1	10	19.8	15.6	44.9
Euroschinus verrucosus	Anacardiaceae	25																25	16.6	31.1	25.1	60.5
Euroschinus vieillardii	Anacardiaceae	13	3		2		3	5											11.1	31.5	30.7	53.5
Pleiogynium timoriense	Anacardiaceae	16													16				20.4	63.4	69.7	113
Semecarpus atra	Anacardiaceae	128	5					7	2	22	26	19	4		33			10	10	28.1	25.2	121
Semecarpus balansae	Anacardiaceae	1																1	22	22	22	22.2
Semecarpus neocaledonica	Anacardiaceae	18												18					10.5	16.6	15.3	23.2
Goniothalamus obtusatus	Annonaceae	1	1																11.8	11.8	11.8	11.8
Huberantha nitidissima	Annonaceae	71										23	2		46				10	13.2	12.7	21.3
Meiogyne baillonii	Annonaceae	8				5				2							1		10.2	12.2	11.7	14.3
Meiogyne lecardii	Annonaceae	2					2												10	10.1	10.1	10.2
Meiogyne tiebaghiensis	Annonaceae	5						5											10	11.3	10.8	14.3
Xylopia dibaccata	Annonaceae	4																4	12.1	17	15.8	24.2
Xylopia pancheri	Annonaceae	2												2					10.2	10.2	10.2	10.2
Xylopia vieillardii	Annonaceae	269	19		13			1	43	32							51	110	10	17.5	16	40.9
Alstonia costata	Apocynaceae	47			7	4	7	2		1							25	1	10	19.4	17.8	60.2
Alstonia lanceolata	Apocynaceae	2			2														10	11.1	11.1	12.7
Alstonia sphaerocapitata	Apocynaceae	18															18		10.2	13.4	13.3	20.4
Alyxia leucogyne	Apocynaceae	4	3											1					10.2	11.8	11.4	14.3
Cerberiopsis candelabra	Apocynaceae	12												12					17.8	41.7	39.5	68.8
Neisosperma brevituba	Apocynaceae	2			2														17.7	18.7	18.7	19.7
Neisosperma miana	Apocynaceae	6												4				2	10.5	17.1	17.2	24.5
Ochrosia grandiflora	Apocynaceae	46						17	6	11		12							10	14.7	13.6	24.2
Parsonsia edulis	Apocynaceae	1					1												10	9.5	9.5	9.5
Rauvolfia balansae	Apocynaceae	26		1	8									13		4			10	13.4	13.7	25
Tabernaemontana cerifera	Apocynaceae	410			1			117	30	18	27	83	42	3	18			71	10	15.3	14.2	46.2
Ilex sebertii	Aquifoliaceae	26	2	2			4	7						10			1		10.7	23.4	20.7	60.1
Meryta balansae	Araliaceae	14		3	1	7	1			2									10	11.5	11	14.8
Meryta oxylaena	Araliaceae	2				2													11.1	11.9	11.9	12.7
Meryta pedunculata	Araliaceae	1		1															11.1	11.1	11.1	11.1
Plerandra gabriellae	Araliaceae	176	3		43	25	30	4	5	9	3	8	11			10	24	1	10	30.6	25.1	121
Plerandra gordonii	Araliaceae	3												3					11	13.5	14.2	15.3
Plerandra leptophylla	Araliaceae	25		1		13		1			2	6				2			10.2	15.5	12.7	33.4
Plerandra moratiana	Araliaceae	3				2				1									10.8	11.9	11.8	13.1
Plerandra pancheri	Araliaceae	5	1		2				2										10.2	14.7	12.4	23.4
Plerandra plerandroides	Araliaceae	9		2					2								3	2	10.8	23.9	13.1	71.6
Polyscias bracteata	Araliaceae	29			1	1	3					2	1			20	1		10	12.6	12.1	19.7
Polyscias cissodendron	Araliaceae	18	3			3	4		3		3		1			1			10.2	16.9	12.3	42.7
Polyscias dioica	Araliaceae	22												22					10.2	14	13	26.4
Polyscias lecardii	Araliaceae	1								1									20.7	20.7	20.7	20.7
Polyscias otopyrena	Araliaceae	1		1															14.3	14.3	14.3	14.3
Polyscias vieillardii	Araliaceae	1			1														10	9.5	9.5	9.5
Schefflera candelabrum	Araliaceae	9		6													3		10.2	20.3	15.6	66.2
Schefflera pseudocandelabrum	Araliaceae	24					24												10.2	17.5	16.8	37.2
Schefflera vieillardii	Araliaceae	47	3			42											2		10.2	17.4	15.6	30.9
Agathis lanceolata	Araucariaceae	13												13					12.9	44.3	37.2	128.9
Agathis moorei	Araucariaceae	48							26	16	1	5							10	36.8	33.9	91.7
Basselinia glabrata	Arecaceae	289														289			10	12	12.1	16.2
Basselinia pancheri	Arecaceae	15												15					10	10.6	10.4	11.7
Burretiokentia vieillardii	Arecaceae	980	15	120	66	476	161	1								94	47		10	11.7	11.5	109.8
Chambeyronia macrocarpa	Arecaceae	70			62			2	1							5			10	16	16.5	28.5
Cyphokentia cerifera	Arecaceae	1	1																13.4	13.4	13.4	13.4
Cyphokentia macrostachya	Arecaceae	75			75														10	12.3	12	16.6
Cyphophoenix alba	Arecaceae	107														107			10	11.4	11.1	22
Cyphophoenix elegans	Arecaceae	1	1																15	15	15	15
Cyphophoenix fulcita	Arecaceae	56												56					10	10.8	10.5	15.3
Kentiopsis magnifica	Arecaceae	35	35																10	18.7	19.1	28.8
Cordyline neocaledonica	Asparagaceae	1						1											10.2	10.2	10.2	10.2
Nemuaron vieillardii	Atherospermataceae	4				4													11.8	24.8	25.8	36
Balanops oliviformis	Balanopaceae	26		11	1	13	1												10.8	35.3	29	73.8
Balanops pachyphylla	Balanopaceae	5												5					12.7	22.5	23.5	32.5
Balanops vieillardii	Balanopaceae	6	6																10.7	16.7	17.2	22
Deplanchea speciosa	Bignoniaceae	105						10						89			6		10	17.4	16.6	31
Cordia aspera	Boraginaceae	1													1				21.9	21.9	21.9	21.9
Canarium oleiferum	Burseraceae	17			1									14			2		11.1	31.5	33.1	53.5
Canarium trifoliolatum	Burseraceae	8								8									10.8	40.6	29.3	72.6
Calophyllum caledonicum	Calophyllaceae	572	224		82		74	11	80	35				52		13	1		10	25.6	22.2	138.8
Mammea neurophylla	Calophyllaceae	15								14					1				12.4	16.9	15.3	23.2
Celtis balansae	Cannabaceae	39													39				14.6	40	42	64.9
Celtis conferta	Cannabaceae	8									3	3	2						10	14.5	12.6	24.5
Celtis paniculata	Cannabaceae	1								1									10.5	10.5	10.5	10.5
Citronella macrocarpa	Cardiopteridaceae	42							12	3		14	13						10.2	30.7	21.7	96.1
Denhamia fournieri	Celastraceae	15					2	2	8		2				1				10.2	22.5	17.2	57.6
Dicarpellum pancheri	Celastraceae	13		8						3							2		10	11.2	10.5	15.1
Ascarina rubricaulis	Chloranthaceae	1														1			16.6	16.6	16.6	16.6
Ascarina solmsiana	Chloranthaceae	87		83		4													10	20.6	14.3	87.6
Hunga rhamnoides	Chrysobalanaceae	2																2	12.6	12.9	12.9	13.2
Garcinia amplexicaulis	Clusiaceae	3														1	2		10	11	11.5	11.5
Garcinia balansae	Clusiaceae	42	9		16			1						12				4	10.1	21	16.8	116.2
Garcinia densiflora	Clusiaceae	184				2		7	15	37	56	51					15	1	10	17	15.9	46.5
Garcinia hennecartii	Clusiaceae	1												1					23.1	23.1	23.1	23.1
Garcinia neglecta	Clusiaceae	95	3		16		2	10	13		6	9	2	24			7	3	10	18.5	16.9	46.4
Garcinia puat	Clusiaceae	138	22		17	7	15	1	34	5	5	13				6	12	1	10	18.9	15.3	68.1
Garcinia vieillardii	Clusiaceae	382	381													1			10	15.7	14	40.4
Garcinia virgata	Clusiaceae	41	31		6	2	1		1										10	21.3	19.9	44.6
Montrouziera cauliflora	Clusiaceae	54		25	15	5	5		1							3			10.5	27.8	22.9	80.5
Montrouziera sphaeroidea	Clusiaceae	4												4					10.2	24	11.5	62.7
Alangium villosum	Cornaceae	66	1			6	3	2		2			6	3				43	10	13.6	12.1	29.3
Corynocarpus dissimilis	Corynocarpaceae	8				2				2					4				10	24.3	13.3	57.6
Codia discolor	Cunoniaceae	5						1						4					16.6	28.9	28	45.4
Codia jaffrei	Cunoniaceae	1												1					10.5	10.5	10.5	10.5
Cunonia aoupiniensis	Cunoniaceae	45		45															10	17.8	14.6	88.4
Cunonia austrocaledonica	Cunoniaceae	14	6			6	1	1											11.5	57.5	55.4	128
Cunonia balansae	Cunoniaceae	59												59					10.2	17.5	15.4	100
Cunonia linearisepala	Cunoniaceae	5	5																38.8	49	47.9	65.6
Cunonia pulchella	Cunoniaceae	1		1															11.5	11.5	11.5	11.5
Geissois montana	Cunoniaceae	8	8																11.5	16.7	15.3	30.8
Geissois pruinosa	Cunoniaceae	22												15			7		10	15.8	15.6	29.3
Geissois racemosa	Cunoniaceae	67					2	52		1			2				6	4	11.8	39.9	31.8	145.1
Pancheria brunhesii	Cunoniaceae	2			2														11.8	23.6	23.7	35.5
Pancheria ternata	Cunoniaceae	3					1	1						1					10.8	17.1	19.3	21.3
Spiraeanthemum densiflorum	Cunoniaceae	15	6	1			5										3		10.7	20	21	35.5
Weinmannia dichotoma	Cunoniaceae	1			1														11.8	11.8	11.8	11.8
Weinmannia paitensis	Cunoniaceae	2		2															10.5	16.7	16.7	22.9
Weinmannia serrata	Cunoniaceae	32		2	1	1										27	1		10	17.2	12.4	81.2
Alsophila stelligera	Cyatheaceae	62					62												10	29.7	21.2	79.6
Alsophila vieillardii	Cyatheaceae	6												6					10.2	11.3	11.2	12.4
Sphaeropteris intermedia	Cyatheaceae	24				4	17									3			10.2	36.8	36.8	70
Sphaeropteris novaecaledoniae	Cyatheaceae	85		49			27	4								1	4		10	12.9	11.7	46.9
Dicksonia munzingeri	Dicksoniaceae	5		5															10	16	15.9	23.1
Dicksonia thyrsopteroides	Dicksoniaceae	210	46	10	30	40	9									75			10	13.7	12.7	37.6
Hibbertia lucens	Dilleniaceae	24												24					10.3	23.3	18.3	46.2
Tetracera billardierei	Dilleniaceae	22						1		6					15				10.2	11.9	11.1	18.8
Diospyros brassica	Ebenaceae	1														1			13.1	13.1	13.1	13.1
Diospyros fasciculosa	Ebenaceae	365						8	7	26	73	73	48		126		1	3	10	18.7	15.9	52.5
Diospyros macrocarpa	Ebenaceae	58	2		6	1	1	14		14							19	1	10	18.9	16.6	107
Diospyros oubatchensis	Ebenaceae	5		5															12.4	14.3	13.7	18.5
Diospyros parviflora	Ebenaceae	6						3									3		10.8	13.4	13.6	17.2
Diospyros rufotomentosa	Ebenaceae	5												3				2	10	15.9	17.6	23.2
Diospyros samoensis	Ebenaceae	212	48		25	8	18	1	43	32	9	2		10		2	13	1	10	17.5	14.6	41.7
Diospyros tireliae	Ebenaceae	32			5				16		2	5						4	10.2	13.6	11.9	32.1
Diospyros trisulca	Ebenaceae	6			3	1				1							1		10	11.8	11.1	16.2
Elaeocarpus angustifolius	Elaeocarpaceae	79						23		8			41		4			3	10	31.5	30.9	71.3
Elaeocarpus dognyensis	Elaeocarpaceae	1							1										12.4	12.4	12.4	12.4
Elaeocarpus guillainii	Elaeocarpaceae	4					1	3											10.8	22.8	23.7	33.1
Elaeocarpus hortensis	Elaeocarpaceae	1								1									62.1	62.1	62.1	62.1
Elaeocarpus leratii	Elaeocarpaceae	1												1					16.4	16.4	16.4	16.4
Elaeocarpus moratii	Elaeocarpaceae	1		1															11.5	11.5	11.5	11.5
Elaeocarpus ovigerus	Elaeocarpaceae	1		1															12.1	12.1	12.1	12.1
Elaeocarpus speciosus	Elaeocarpaceae	19	2					15										2	10.8	29	22	63.7
Elaeocarpus toninensis	Elaeocarpaceae	1			1														25.3	25.3	25.3	25.3
Elaeocarpus vieillardii	Elaeocarpaceae	4	1					3											23.6	25.9	23.9	30.2
Elaeocarpus yateensis	Elaeocarpaceae	1												1					22	22	22	22
Sloanea koghiensis	Elaeocarpaceae	1				1													33.1	33.1	33.1	33.1
Sloanea lepida	Elaeocarpaceae	7							1	6									29.9	53	44.6	93.9
Sloanea magnifolia	Elaeocarpaceae	68		68															11.1	20.1	18.5	76
Sloanea ramiflora	Elaeocarpaceae	9					1		1								7		10.8	15.7	14	24.2
Sloanea raynaliana	Elaeocarpaceae	5	5																10.3	16.1	16.9	22
Styphelia cymbulae	Ericaceae	5					2	2						1					10.8	18	15.6	35
Polyosma leratii	Escalloniaceae	5														5			10	13.1	13.1	16.6
Polyosma spicata	Escalloniaceae	7		7															10.3	12.3	11.8	16.6
Aleurites moluccana	Euphorbiaceae	14											14						11.1	30.5	27.9	78.9
Baloghia inophylla	Euphorbiaceae	71							4	1	15	35	12		4				10	12.3	11.8	22.4
Baloghia montana	Euphorbiaceae	8	3		5														10.2	21.3	21.3	29.6
Claoxylon insulanum	Euphorbiaceae	1						1											10.2	10.2	10.2	10.2
Cleidion macarangoides	Euphorbiaceae	1											1						13.8	13.8	13.8	13.8
Cleidion spathulatum	Euphorbiaceae	1														1			10.5	10.5	10.5	10.5
Cleidion vieillardii	Euphorbiaceae	2												2					10.2	10.5	10.5	10.8
Codiaeum peltatum	Euphorbiaceae	34	1			1		5	2	6	11	4	4						10	11.5	11.1	15.6
Fontainea pancheri	Euphorbiaceae	4													4				10.7	12.7	11.9	16.1
Macaranga alchorneoides	Euphorbiaceae	43						2									41		10.2	16.6	14.3	28.6
Macaranga corymbosa	Euphorbiaceae	42			29		4	1		1							7		10	12.4	11.5	18.4
Neoguillauminia cleopatra	Euphorbiaceae	8												8					10.8	44	37.7	89.1
Storckiella pancheri	Fabaceae-Caesalpinoideae	23						4						17				2	10.8	28.1	20.7	70.3
Albizia saman	Fabaceae-Mimosoideae	1											1						28	28	28	28
Archidendropsis fournieri	Fabaceae-Mimosoideae	5									1	4							11.5	17.2	15.3	29.3
Archidendropsis fulgens	Fabaceae-Mimosoideae	8			8														10.2	13.6	12.4	17.5
Archidendropsis glandulosa	Fabaceae-Mimosoideae	14						1										13	10.2	48.1	49.9	75.4
Archidendropsis granulosa	Fabaceae-Mimosoideae	26							5				6	13				2	10.4	32.8	30.8	71.6
Archidendropsis streptocarpa	Fabaceae-Mimosoideae	20					19										1		11.5	28.2	28.8	50.9
Serianthes sachetae	Fabaceae-Mimosoideae	24										11					13		10.8	27.4	28.3	59.2
Arthroclianthus balansae	Fabaceae-Papilionoideae	1									1								10.2	10.2	10.2	10.2
Fagraea berteroana	Gentianaceae	16			1			14									1		10.2	20	19.4	40.6
Coronanthera deltoidifolia	Gesneriaceae	3		3															10.5	26.2	11.5	56.6
Depanthus glaber	Gesneriaceae	14				14													12.4	24	19.8	53.4
Gyrocarpus americanus	Hernandiaceae	29													29				10.5	26.3	15	81.5
Hernandia cordigera	Hernandiaceae	133	1		7	2	21	10	8	2	9	11				8	54		10	25.5	20.4	64.6
Gmelina magnifica	Lamiaceae	13	13																13.1	22.5	19.1	61.1
Oxera robusta	Lamiaceae	4						1		1						2			10.5	11	11	11.5
Oxera sessilifolia	Lamiaceae	3		3															10	10.9	11.1	11.7
Oxera sulfurea	Lamiaceae	16									14	2							10.5	18.7	15	38.5
Vitex collina	Lamiaceae	1								1									10.8	10.8	10.8	10.8
Beilschmiedia neocaledonica	Lauraceae	1			1														20.8	20.8	20.8	20.8
Beilschmiedia oreophila	Lauraceae	9												9					10.5	15.1	15.1	18.7
Cryptocarya (aff_aristata_Munzinger5874)	Lauraceae	59	5		4	3	5		7	8		3				2	22		10.2	17.2	13.4	56.7
Cryptocarya (aurea_Munzinger4792)	Lauraceae	42		2												40			10.2	24	23.9	41.7
Cryptocarya (McPherson4408)	Lauraceae	2							1								1		11.1	13.1	13.1	15
Cryptocarya adpressa	Lauraceae	3														3			13.1	21.2	14.3	36.3
Cryptocarya aristata	Lauraceae	47		36		7	3		1										10.2	22.9	19.4	81.2
Cryptocarya barrabeae	Lauraceae	6	2				2		1								1		14	22.4	21.7	33.7
Cryptocarya elliptica	Lauraceae	84			7	3	7	6	4		24	13				3	17		10	21.6	19.8	68.1
Cryptocarya gracilis	Lauraceae	6		1										5					10.2	14.8	14.7	19.4
Cryptocarya guillauminii	Lauraceae	1												1					10.2	10.2	10.2	10.2
Cryptocarya longifolia	Lauraceae	74		15						17		35				7			10	16.8	14.2	47.1
Cryptocarya macrodesme	Lauraceae	19		5	3					6						2	3		10	14.6	13.7	23.2
Cryptocarya odorata	Lauraceae	56												21				35	10.2	19.5	16.2	45.5
Cryptocarya oubatchensis	Lauraceae	99		61	1	23		1								13			10	14.4	12.7	43
Cryptocarya pluricostata	Lauraceae	45			11	1	16	3	2	4	2	1					5		10	19.9	14	69.1
Cryptocarya transversa	Lauraceae	1												1					30.6	30.6	30.6	30.6
Cryptocarya velutinosa	Lauraceae	55		19	26		5										5		10.2	16.5	13.7	57.3
Endiandra baillonii	Lauraceae	10				2								8					10.5	15.3	15.9	20.1
Endiandra polyneura	Lauraceae	45				1	10		2	2								30	10	18.8	15.9	55.4
Barringtonia longifolia	Lecythidaceae	57			28											26		3	10	17.9	15.6	36
Barringtonia neocaledonica	Lecythidaceae	29						29											12.7	31.6	32.5	48.7
Hugonia jenkinsii	Linaceae	26							4	16	2	2					2		10	11.1	10.8	15.3
Geniostoma novaecaledoniae	Loganiaceae	1				1													12.4	12.4	12.4	12.4
Neuburgia novocaledonica	Loganiaceae	85	12		6	26	11	5		4						4	13	4	10	28.9	22.9	99.9
Acropogon aoupiniensis	Malvaceae	188		188															10	16.2	14.3	54.1
Acropogon grandiflorus	Malvaceae	7														7			10.5	13.9	13.1	17.5
Acropogon merytifolius	Malvaceae	12			12														10	12	11.3	14.5
Acropogon sageniifolius	Malvaceae	1				1													11.5	11.5	11.5	11.5
Acropogon schistophilus	Malvaceae	5														5			13.1	19.6	19.1	30.2
Acropogon schumannianus	Malvaceae	1				1													11.1	11.1	11.1	11.1
Maxwellia lepidota	Malvaceae	4												4					16.4	29.5	24.3	53
Aglaia elaeagnoidea	Meliaceae	102													102				10	16.4	15.3	34.4
Anthocarapa nitidula	Meliaceae	45	15		9	2	13		1								5		10	26.6	25.8	66.8
Dysoxylum bijugum	Meliaceae	23				1			1	5	1	2	7		4		2		10	15.7	13.7	31
Dysoxylum canalense	Meliaceae	1												1					10.2	10.2	10.2	10.2
Dysoxylum kouiriense	Meliaceae	264		64	9	54	51		6							61	19		10	16.7	14	82.1
Dysoxylum macranthum	Meliaceae	94				4	8	66	4	3		1						8	10	13.9	12.4	33.1
Dysoxylum macrostachyum	Meliaceae	20						16	2			2							10.2	16.1	13.1	30.9
Dysoxylum minutiflorum	Meliaceae	9												9					10.2	11.3	11.4	12.8
Dysoxylum pachypodum	Meliaceae	1								1									11.5	11.5	11.5	11.5
Dysoxylum roseum	Meliaceae	247	14	15	38	4	34	42	14	2			2		8	2	29	43	10	29.1	27.7	97.1
Dysoxylum roseum	Meliaceae	169	39	14	6	3	24	7	10	7	7		22			2	28		10	15	13.1	51.6
Melia azedarach	Meliaceae	4													4				10	26.8	24	49.3
Pachygone loyaltiensis	Menispermaceae	1	1																10	10	10	10
Pachygone tomentella	Menispermaceae	2								1								1	10	10.4	10.4	10.8
Apodytes clusiifolia	Metteniusaceae	256	45	40		92	70									1		8	10	29.1	24.9	94.2
Hedycarya chrysophylla	Monimiaceae	1			1														13.1	13.1	13.1	13.1
Hedycarya cupulata	Monimiaceae	309	27	4	33	8	20	35	2	3		1	41			65	52	18	10	14.8	12.4	47.7
Hedycarya engleriana	Monimiaceae	123	21	2		12	19	16	3	2						22	25	1	10	14.4	12.7	43.3
Hedycarya parvifolia	Monimiaceae	21		14	2							1				4			10	14.8	13.4	31.2
Kibaropsis caledonica	Monimiaceae	11		2	8	1													10.2	22.6	19.1	42.7
Ficus austrocaledonica	Moraceae	9	1			3											4	1	13.7	27.1	25.8	47.7
Ficus habrophylla	Moraceae	52					2	22		2	3	1	9		1		5	7	10.2	18.7	16.9	41.1
Ficus leiocarpa	Moraceae	5				3				2									11.5	14.6	15	17.2
Ficus mutabilis	Moraceae	1											1						10.1	10.1	10.1	10.1
Ficus nitidifolia	Moraceae	3												3					10.3	11.6	11.1	13.4
Ficus obliqua	Moraceae	33				5	5	8	1	3	4	4	3						10.8	80.8	61.6	249.9
Ficus otophora	Moraceae	37	1	1		9		1								25			10	16.2	14.6	42.7
Ficus pancheriana	Moraceae	12			1	9	2												10.3	21.9	21.8	36.3
Ficus racemigera	Moraceae	90	3	1	4	22	24	1	4	12						8	9	2	10	16.1	15	32.5
Ficus versicolor	Moraceae	13				11	2												11.8	24.8	19.4	54.1
Ficus vieillardiana	Moraceae	33	8		19		4										2		10	15.4	13.1	33.7
Ficus virens	Moraceae	8											8						11.3	19.4	17.5	30.4
Ficus virgata	Moraceae	1														1			54.1	54.1	54.1	54.1
Sparattosyce balansae	Moraceae	101	5			6		40	10	28		11		1					10	22.2	21.6	45.8
Sparattosyce dioica	Moraceae	149				39	7			6				95				2	10	24.5	17.5	202.4
Trophis scandens	Moraceae	3								1		1	1						10.2	10.9	10.5	12.1
Delarbrea harmsii	Myodocarpaceae	18	6				9		2								1		10	14.4	12.9	21
Delarbrea paradoxa	Myodocarpaceae	3	1			1											1		11.1	14.9	15	18.8
Myodocarpus fraxinifolius	Myodocarpaceae	11												11					10.1	14.3	14	19.4
Myodocarpus involucratus	Myodocarpaceae	1												1					10.3	10.3	10.3	10.3
Myodocarpus pinnatus	Myodocarpaceae	34		19	14		1												11.8	21.9	20.6	49.8
Archirhodomyrtus baladensis	Myrtaceae	4						1									3		10.2	10.9	10.5	12.4
Archirhodomyrtus turbinata	Myrtaceae	1																1	16	16	16	16
Eugenia (poroensis_Barrab?293)	Myrtaceae	10												10					10.6	16	14.5	36.1
Eugenia brongniartiana	Myrtaceae	2						1				1							11.1	12.3	12.3	13.4
Eugenia mouensis	Myrtaceae	2						2											12.4	16.4	16.4	20.4
Eugenia ovigera	Myrtaceae	2						1						1					10	21.9	21.9	33.7
Eugenia paludosa	Myrtaceae	6															6		10.2	11.2	10.5	13.4
Gossia ramiflora	Myrtaceae	1			1														17.1	17.1	17.1	17.1
Gossia vieillardii	Myrtaceae	2														2			13.1	13.6	13.6	14
Kanakomyrtus longipetiolata	Myrtaceae	2		1												1			19.4	44.3	44.3	69.1
Melaleuca quinquenervia	Myrtaceae	11						11											15	24.9	24.8	43.9
Metrosideros brevistylis	Myrtaceae	15		15															10.5	21.8	15.6	55.9
Metrosideros laurifolia	Myrtaceae	12	2		1		1	7									1		16.6	39.6	23.9	119.4
Metrosideros tardiflora	Myrtaceae	26		26															10	48	50.8	109.7
Piliocalyx (macrophylla_MacKee26643)	Myrtaceae	96															96		10	20.6	16.9	63
Piliocalyx bullatus	Myrtaceae	17			8				3	1							5		10.2	22	15.9	50.9
Piliocalyx laurifolius	Myrtaceae	121	24	52	21	1			3		1	9		9			1		10	22.2	14.3	170.3
Piliocalyx wagapensis	Myrtaceae	94				5	4	54		17							10	4	10	19.5	16.9	59.2
Pleurocalyptus pancheri	Myrtaceae	84												84					10	17.6	16	43.4
Rhodamnia andromedoides	Myrtaceae	2												2					13.8	20.1	20.1	26.3
Syzygium amieuense	Myrtaceae	16			1		2			1						12			10.2	31.4	30.6	52.2
Syzygium aoupinianum	Myrtaceae	17				7			5	1							4		10	32.7	18.8	139.9
Syzygium apetiolatum	Myrtaceae	3		3															17.5	22.8	19.4	31.5
Syzygium arboreum	Myrtaceae	1	1																20.2	20.2	20.2	20.2
Syzygium austrocaledonicum	Myrtaceae	5						2						3					10	14	13.4	18.1
Syzygium baladense	Myrtaceae	9	1							2				6					10	25	18	65.4
Syzygium balansae	Myrtaceae	1									1								35.7	35.7	35.7	35.7
Syzygium brachycalyx	Myrtaceae	5					4	1											12.4	28.5	32.1	42
Syzygium brongniartii	Myrtaceae	9															9		10.5	27	23.6	61.1
Syzygium capillaceum	Myrtaceae	8	8																11.5	19.2	17.4	34.1
Syzygium densiflorum	Myrtaceae	48					2		13		4	3					1	25	10.2	26.8	22	117.1
Syzygium frutescens	Myrtaceae	31	11		3									17					10.8	42.1	26.7	144.5
Syzygium koumacense	Myrtaceae	3													3				12.1	16.4	14.8	22.3
Syzygium macranthum	Myrtaceae	118	11	1	12	1	3		12	28	1	9					4	36	10	30.3	22.5	109.8
Syzygium mouanum	Myrtaceae	2												2					10.5	11.4	11.5	12.4
Syzygium multipetalum	Myrtaceae	6												6					15.1	28.5	26	42.5
Syzygium pancheri	Myrtaceae	1															1		10.5	10.5	10.5	10.5
Syzygium paniense	Myrtaceae	4														4			20.7	23.1	23.1	25.5
Syzygium toninense	Myrtaceae	1															1		10.2	10.2	10.2	10.2
Syzygium tripetalum	Myrtaceae	5		2	3														10.8	20.7	19.5	39.8
Syzygium wagapense	Myrtaceae	4	1						2	1									10.8	34.2	14.5	97
Nothofagus aequilateralis	Nothofagaceae	57			55									2					10	26.9	26.4	56.3
Pisonia artensis	Nyctaginaceae	7											2		5				19.7	66.2	36.3	219.3
Pisonia gigantocarpa	Nyctaginaceae	136	7	1	21	10	7	1	19	4		1				43	20	2	10	16.4	14	39.8
Chionanthus brachystachys	Oleaceae	67	6		4		11	2		30	1			11		1	1		10	18.3	15.9	41.4
Chionanthus pedunculatus	Oleaceae	101	1	17	4	14			37			14						14	10.2	17.9	15.6	65.9
Olea paniculata	Oleaceae	112						4		2	1	10	86		9				10.2	28.2	27	58.6
Osmanthus austrocaledonicus	Oleaceae	1						1											14	14	14	14
Oncotheca balansae	Oncothecaceae	4			4														12.1	15.3	13.2	22.8
Oncotheca humboldtiana	Oncothecaceae	10			1									9					10.5	15.7	13.2	22.9
Pandanus balansae	Pandanaceae	1														1			10	9.9	9.9	9.9
Pandanus pancheri	Pandanaceae	5												5					10	10.5	10.5	10.9
Paracryphia alticola	Paracryphiaceae	37		37															10	25.2	16.9	104.2
Sphenostemon comptonii	Paracryphiaceae	1														1			32.1	32.1	32.1	32.1
Sphenostemon pachycladum	Paracryphiaceae	3												3					14	18.5	18	23.6
Phelline dumbeensis	Phellinaceae	1		1															10	10	10	10
Bischofia javanica	Phyllanthaceae	21				5	1	5		1					9				12.7	37.1	35.7	74.5
Cleistanthus stipitatus	Phyllanthaceae	38					1						4				30	3	10.2	17.3	15	41.4
Phyllanthus billardierei	Phyllanthaceae	50	3		12	3	2	1	7		3					7	12		11.1	18.4	16.6	39.5
Phyllanthus caledonicum	Phyllanthaceae	1								1									30.2	30.2	30.2	30.2
Phyllanthus deplanchei	Phyllanthaceae	1									1								10.5	10.5	10.5	10.5
Austrobuxus alticola	Picrodendraceae	5	5																15.6	29.4	25.5	45
Austrobuxus carunculatus	Picrodendraceae	1															1		28	28	28	28
Austrobuxus ovalis	Picrodendraceae	17		17															10.2	16.3	13.4	29
Austrobuxus pauciflorus	Picrodendraceae	7												1				6	12.7	24.1	24.5	41.4
Austrobuxus vieillardii	Picrodendraceae	1														1			10	9.9	9.9	9.9
Pittosporum mackeei	Pittosporaceae	1							1										10.2	10.2	10.2	10.2
Pittosporum oreophilum	Pittosporaceae	1		1															12.4	12.4	12.4	12.4
Podocarpus sylvestris	Podocarpaceae	1					1												39.8	39.8	39.8	39.8
Myrsine arborea	Primulaceae	8	2		2											4			10.8	19	15.6	32.5
Myrsine asymmetrica	Primulaceae	20		19				1											10.2	15.4	13.3	47
Myrsine citrifolia	Primulaceae	251	4	35	29				29	85	14	52				3			10	18.3	16.6	41.4
Myrsine lanceolata	Primulaceae	4				1			1	2									10.2	11.3	10.5	13.7
Myrsine lanceolata	Primulaceae	2												2					10.1	11.1	11.1	12.1
Myrsine ovicarpa	Primulaceae	4												4					11.8	15.9	15.5	21
Myrsine parvicarpa	Primulaceae	6			6														10	11.7	11.9	13.2
Tapeinosperma nectandroides	Primulaceae	2																2	10.5	11.6	11.6	12.7
Tapeinosperma nitidum	Primulaceae	4		4															10.5	19.3	12.5	41.6
Tapeinosperma oblongifolium	Primulaceae	6		1				5											10	10.9	10.9	12.4
Tapeinosperma pancheri	Primulaceae	1				1													10.8	10.8	10.8	10.8
Tapeinosperma robustum	Primulaceae	5	5																10.7	15.4	14	24.8
Tapeinosperma vieillardii	Primulaceae	19		4	12		3												10.1	16.1	13.2	46.6
Tapeinosperma wagapense	Primulaceae	14		1			1			10			2						10	10.9	10.7	13.2
Beauprea filipes	Proteaceae	1		1															36.2	36.2	36.2	36.2
Beauprea montana	Proteaceae	1												1					12.4	12.4	12.4	12.4
Kermadecia elliptica	Proteaceae	3							1		1							1	30.2	35	34.1	40.7
Kermadecia rotundifolia	Proteaceae	103	18	1			6		5	15		9				4		45	10.2	27.8	25.5	76.7
Kermadecia sinuata	Proteaceae	72			15	2	27	9	18	1									10	24	17.5	78.3
Sleumerodendron austrocaledonicum	Proteaceae	5		5															11.1	24.1	21.6	36.9
Stenocarpus trinervis	Proteaceae	7							1					6					14.6	27.8	24.7	56.3
Virotia leptophylla	Proteaceae	117					7		21	44	1	44							10	20.8	16.6	75.8
Virotia vieillardii	Proteaceae	6	6																12.4	19.5	15.8	31.2
Drypetes deplanchei	Putranjivaceae	2									2								10.5	15.8	15.8	21
Alphitonia neocaledonica	Rhamnaceae	17												9			8		10	16.2	14	26.1
Jaffrea xerocarpa	Rhamnaceae	1												1					18.1	18.1	18.1	18.1
Crossostylis grandiflora	Rhizophoraceae	252	1		7			84	29	9		2					33	87	10	15.3	13.5	48.7
Crossostylis multiflora	Rhizophoraceae	239	17	64	30	11	26									90	1		10	25	19.3	91.4
Crossostylis seberti	Rhizophoraceae	4												4					13.7	19.6	18.8	27.4
Aidia congestum	Rubiaceae	1			1														11.9	11.9	11.9	11.9
Antirhea baladensis	Rubiaceae	45	2	6	20	1	2									2		12	10.5	20.7	17	50.1
Antirhea eximia	Rubiaceae	30												30					10	14.3	11.2	75.9
Antirhea glabrescens	Rubiaceae	1						1											11.8	11.8	11.8	11.8
Antirhea rhamnoides	Rubiaceae	4																4	13.4	16.4	15.9	20.4
Antirhea splendens	Rubiaceae	1												1					14.5	14.5	14.5	14.5
Antirhea wagapensis	Rubiaceae	49	2		32	2			4								9		10	14.5	13.1	26.7
Atractocarpus (spA_MacKee25341)	Rubiaceae	6		6															10	11.3	10.8	13.5
Gardenia aubryi	Rubiaceae	7												6				1	10	11.3	11.3	13.7
Gardenia oudiepe	Rubiaceae	78			27		14		16		5	2				7	7		10	13.7	12.4	30.9
Gea connatistipula	Rubiaceae	1												1					10.5	10.5	10.5	10.5
Guettarda balansaeana	Rubiaceae	1																1	11.5	11.5	11.5	11.5
Margaritopsis collina	Rubiaceae	17			1	7	1		4							2	2		10	11.6	11	16.6
Psychotria canalensis	Rubiaceae	2								2									10.2	10.2	10.2	10.2
Tarenna ignambiensis	Rubiaceae	2			2														11.1	14.3	14.3	17.5
Acronychia laevis	Rutaceae	44									27	16	1						10	12.4	11.7	23.9
Comptonella drupacea	Rutaceae	63					3	10		6	2		24			1	17		10.1	13.4	12.6	25.8
Comptonella microcarpa	Rutaceae	20		20															10.2	12.4	12.2	16.2
Comptonella oreophila	Rutaceae	2		2															14	14.9	15	15.9
Crossosperma velutina	Rutaceae	3	3																12.1	16.3	13.8	23
Dutaillyea amosensis	Rutaceae	3			2											1			14.2	25.6	15.1	47.4
Flindersia fournieri	Rutaceae	26						3						19				4	13.1	26.1	21.7	56.7
Geijera balansae	Rutaceae	437							8	10	411	1						7	10	15.3	14	38.5
Halfordia kendack	Rutaceae	1						1											11.8	11.8	11.8	11.8
Picrella glandulosa	Rutaceae	5					2	1	1	1									10	11.3	11.1	13.4
Picrella ignambiensis	Rutaceae	1		1															13.7	13.7	13.7	13.7
Sarcomelicope follicularis	Rutaceae	146									38	106						2	10	17	14.6	43
Sarcomelicope leiocarpa	Rutaceae	1								1									31.2	31.2	31.2	31.2
Sarcomelicope simplicifolia	Rutaceae	11											11						10	12.6	12.3	15.2
Zanthoxylum neocaledonicum	Rutaceae	19			5	3				1								10	10	15.8	15	26.4
Casearia deplanchei	Salicaceae	2									2								11.8	11.9	12	12.1
Casearia puberula	Salicaceae	2															2		10.2	10.5	10.5	10.8
Casearia silvana	Salicaceae	3				1		1										1	10	11.1	11.1	12.1
Homalium decurrens	Salicaceae	2	2																10	11.7	11.7	13.4
Homalium deplanchei	Salicaceae	416									2		369		2		43		10	16	13.8	99.3
Homalium guillainii	Salicaceae	8												8					10	15.6	14.5	23.4
Homalium intermedium	Salicaceae	2			1		1												10.8	16.1	16.2	21.5
Lasiochlamys reticulata	Salicaceae	2			2														15.2	15.6	15.6	16
Xylosma vincentii	Salicaceae	226							17	25	131	53							10	13.3	12.7	34.4
Arytera arcuata	Sapindaceae	88					4		18		48	18							10	20.6	17.8	60.2
Arytera chartacea	Sapindaceae	10								10									18.5	43.7	40.4	70
Arytera lepidota	Sapindaceae	2												2					10.3	10.4	10.4	10.5
Arytera neoebudensis	Sapindaceae	2	2																13.1	19.1	19.1	25.1
Cupaniopsis apiocarpa	Sapindaceae	3								1			1		1				10.2	24.4	31.4	31.5
Cupaniopsis chytradenia	Sapindaceae	25							16			9							10	14.4	13.7	24.8
Cupaniopsis fruticosa	Sapindaceae	2																2	14	15.9	15.9	17.7
Cupaniopsis globosa	Sapindaceae	35									35								10.2	22.8	23.6	38.8
Cupaniopsis macrocarpa	Sapindaceae	336		7	44	9	14	6	74	15	16					45	47	59	10	15.8	13.5	109.8
Cupaniopsis myrmoctona	Sapindaceae	3					1		1							1			11.1	14.5	15.9	16.6
Cupaniopsis petiolulata	Sapindaceae	340	67			2	32	2	42	43	8	35				59	50		10	16.5	14.6	57
Cupaniopsis phalacrocarpa	Sapindaceae	115		114												1			10	14.1	13.1	33.7
Cupaniopsis sylvatica	Sapindaceae	199	5		2	1	11	13	36	13	10	44	3			2	57	2	10	16.6	14.3	72.9
Cupaniopsis trigonocarpa	Sapindaceae	1											1						18.4	18.4	18.4	18.4
Elattostachys apetala	Sapindaceae	106	3			7	5	27	11	11	17	21	2					2	10	20.2	16.6	71.6
Gongrodiscus bilocularis	Sapindaceae	17			9									7		1			10.5	18.1	15.6	35
Gongrodiscus sufferrugineus	Sapindaceae	50	1		1		1	1	6	4							36		10	17.4	15.6	38.5
Guioa glauca	Sapindaceae	33			5		1	2	7		4			14					10	12.7	12.1	18
Guioa microsepala	Sapindaceae	75	3	54												18			10	13.5	12.7	30.9
Guioa ovalis	Sapindaceae	75	1	4	10	2	7			2	1	1				32	15		10	13.5	13.1	35.7
Guioa villosa	Sapindaceae	53			2				1			1		1			48		10	13.6	12.7	22.6
Harpullia austrocaledonica	Sapindaceae	28	3		9		2				6	3	1					4	10	13.7	11.5	33.1
Podonephelium concolor	Sapindaceae	25	16							2		7							10	15.1	12.4	42.7
Podonephelium pachycaule	Sapindaceae	14	3		1				3	5								2	10.2	12.9	13.2	17.7
Podonephelium subaequilaterum	Sapindaceae	11									11								10.2	11.8	11.1	15.3
Storthocalyx chryseus	Sapindaceae	66												66					10	17.5	14.6	144.5
Storthocalyx corymbosus	Sapindaceae	147		27	54		15	2	19	2						20	8		10	16.6	13.8	50
Storthocalyx pancheri	Sapindaceae	1						1											19.4	19.4	19.4	19.4
Storthocalyx sordidus	Sapindaceae	50	4					1	2								21	22	10.2	19.6	17.2	38.5
Mimusops elengi	Sapotaceae	3													3				10.8	18.7	16.9	28.3
Planchonella amieuana	Sapotaceae	1	1																30.6	30.6	30.6	30.6
Planchonella endlicheri	Sapotaceae	126			27			3		13	1			75				7	10.2	27.1	24.6	151
Planchonella kuebiniensis	Sapotaceae	13												13					13.7	40	37.6	79.9
Planchonella luteocostata	Sapotaceae	3													3				10.2	11.1	10.5	12.7
Planchonella roseoloba	Sapotaceae	3															3		11.1	11.8	11.1	13.1
Planchonella rufocostata	Sapotaceae	8			8														10	12.3	12	15.1
Planchonella sphaerocarpa	Sapotaceae	64	7		20		11		5	1	1						13	6	10	36.9	32.1	106.6
Planchonella thiensis	Sapotaceae	13												13					10.1	25.4	23.4	45.6
Planchonella wakere	Sapotaceae	55							14		9	20						12	10.5	38.7	36	105.7
Pleioluma rubicunda	Sapotaceae	14		13					1										10.2	17.5	16.6	31.2
Pycnandra acuminata	Sapotaceae	39												39					10	19.9	16.6	47.1
Pycnandra balansae	Sapotaceae	83			2		3	68									10		10	17.9	15	53.2
Pycnandra benthamii	Sapotaceae	8		8															10.7	15.6	15.3	23.9
Pycnandra canaliculata	Sapotaceae	1												1					20.6	20.6	20.6	20.6
Pycnandra comptonii	Sapotaceae	166			12	18	60									76			10	25	20.4	108.2
Pycnandra controversa	Sapotaceae	1														1			11.1	11.1	11.1	11.1
Pycnandra fastuosa	Sapotaceae	16												16					10.2	21.8	17	50.6
Pycnandra gordoniifolia	Sapotaceae	3						3											15.3	22.1	21.6	29.3
Pycnandra pubiflora	Sapotaceae	1												1					23.7	23.7	23.7	23.7
Pycnandra sarlinii	Sapotaceae	1					1												14.2	14.2	14.2	14.2
Pycnandra sessilifolia	Sapotaceae	5												5					12.7	20.9	18.6	29.6
Soulamea tomentosa	Simaroubaceae	9													3		6		10	14.4	12.1	24.2
Soulamea trifoliata	Simaroubaceae	2												2					11.5	11.8	11.8	12.1
Gastrolepis austrocaledonica	Stemonuraceae	36			2									34					10.1	28.1	25.4	62.4
Symplocos arborea	Symplocaceae	48	6				3		17	3	1	10					8		10.5	23.1	20.6	45.8
Symplocos caerulescens	Symplocaceae	1					1												12.1	12.1	12.1	12.1
Symplocos flavescens	Symplocaceae	2			2														12.7	15.4	15.4	18
Symplocos montana	Symplocaceae	7	1		1					2						3			11.5	17.5	15.5	31.8
Symplocos neocaledonica	Symplocaceae	10	1	2		2										5			10.3	11.4	11	15.3
Lethedon balansae	Thymelaeaceae	8		8															10.2	11.8	11.2	14.6
Trimenia neocaledonica	Trimeniaceae	14	3	9												2			10.8	20.1	14.5	66.5
Dendrocnide peltata	Urticaceae	1				1													23.6	23.6	23.6	23.6
Pipturus argenteus	Urticaceae	2													2				11.5	18	18	24.5
Agatea rufotomentosa	Violaceae	13				3	1		1	6	1	1							10	12.6	11.8	17.5
Zygogynum mackeei	Winteraceae	1		1															11.1	11.1	11.1	11.1
Zygogynum pomiferum	Winteraceae	3																3	11	12.2	11.8	13.7
Zygogynum stipitatum	Winteraceae	1															1		17.2	17.2	17.2	17.2
